# Supplementary material for: Transmission patterns of rifampicin resistant Mycobacterium tuberculosis complex strains in Cameroon: a genomic epidemiological study
Source: PubMed Central journal article supplement (PMC8406724; doi:10.1186/s12879-021-06593-8), 2021-08-31
Supplement: 12879_2021_6593_MOESM4_ESM.pdf [file 12879_2021_6593_MOESM4_ESM.pdf]

Table S3. Comparison of patient characteristics, included versus excluded RR/MDR-TB patients

|                               | All MDR/RR-TB cases, n (%) | Included in analysis, n (%) | Not included in analysis, n (%) | P-value chi-squared all categories | P-value pairwise Fisher exact |
|-------------------------------|----------------------------|-----------------------------|---------------------------------|------------------------------------|-------------------------------|
|                               | N=261                      | N=195                       | N=66                            |                                    |                               |
| Age (N=240), mean years (IQR) | 35 (IQR 27-43)             | 34 (IQR 27-43)              | 35 (IQR 29-43)                  | 0.3*                               | NA                            |
| Age, unknown                  | 21                         | 12                          | 9                               |                                    | 0.07                          |
| Sex                           |                            |                             |                                 |                                    |                               |
| Female                        | 109 (42%)                  | 78 (40%)                    | 31 (47%)                        | 0.6                                | 0.31                          |
| Male                          | 145 (56%)                  | 112 (57%)                   | 33 (50%)                        |                                    | NA                            |
| Unknown                       | 7 (3%)                     | 5 (3%)                      | 2 (3%)                          |                                    |                               |
| HIV status                    |                            |                             |                                 |                                    |                               |
| Negative                      | 116 (44%)                  | 101 (52%)                   | 15 (23%)                        | <0.001                             | 0.10                          |
| Positive                      | 69 (26%)                   | 53 (27%)                    | 16 (24%)                        |                                    | NA                            |
| Unknown                       | 76 (29%)                   | 41 (21%)                    | 35 (53%)                        |                                    |                               |
| Type of case                  |                            |                             |                                 |                                    |                               |
| Contact                       | 14 (5%)                    | 12 (6%)                     | 2 (3%)                          | 0.002                              | 0.53                          |
| New                           | 17 (7%)                    | 14 (7%)                     | 3 (5%)                          |                                    | 0.77                          |
| Failure                       | 102 (39%)                  | 85 (44%)                    | 17 (26%)                        |                                    | 0.76                          |
| Return LTFU                   | 13 (5%)                    | 8 (4%)                      | 5 (8%)                          |                                    | 0.31                          |
| Relapse                       | 99 (38%)                   | 67 (34%)                    | 32 (49%)                        |                                    | 0.02*                         |
| Other/Unknown                 | 16 (6%)                    | 9 (5%)                      | 7 (11%)                         |                                    | NA                            |
| Year                          |                            |                             |                                 |                                    |                               |
| 2012                          | 74 (28%)                   | 56 (29%)                    | 18 (27%)                        | 0.8                                | 0.88                          |
| 2013                          | 88 (34%)                   | 63 (32%)                    | 25 (38%)                        |                                    | 0.45                          |
| 2014                          | 68 (26%)                   | 51 (26%)                    | 17 (26%)                        |                                    | 1.0                           |
| 2015                          | 31 (12%)                   | 25 (13%)                    | 6 (9%)                          |                                    | 0.51                          |
| Region                        |                            |                             |                                 |                                    |                               |
| Littoral                      | 172 (66%)                  | 131 (67%)                   | 41 (62%)                        | 0.7                                | 0.46                          |
| Northwest                     | 45 (17%)                   | 34 (17%)                    | 11 (17%)                        |                                    | 1.0                           |
| Southwest                     | 14 (5%)                    | 9 (5%)                      | 5 (8%)                          |                                    | 0.35                          |
| West                          | 30 (12%)                   | 21 (11%)                    | 9 (14%)                         |                                    | 0.51                          |

\* Mann Whitney U test
